# Supplementary material for: Enantioselective first total synthesis of eujavanoic acid B through organocatalyzed IMDA reaction
Source: Royal Society of Chemistry journal article supplement (doi:10.1039/c4ra16136j), 2015-01-01
Supplement: c4ra16136j1.pdf [file c4ra16136j1.pdf]

**SUPPORTING INFORMATION**

Enantioselective first total synthesis of eujavanoic acid B through organocatalyzed IMDA reaction.

Jayprakash Narayan Kumar and Biswanath Das\*

## Contents

**Copies of  $^1\text{H}$  NMR and  $^{13}\text{C}$  NMR Spectra of all Compounds along with Some  
Selected HPLC Chromatograms, Mass and IR spectra**

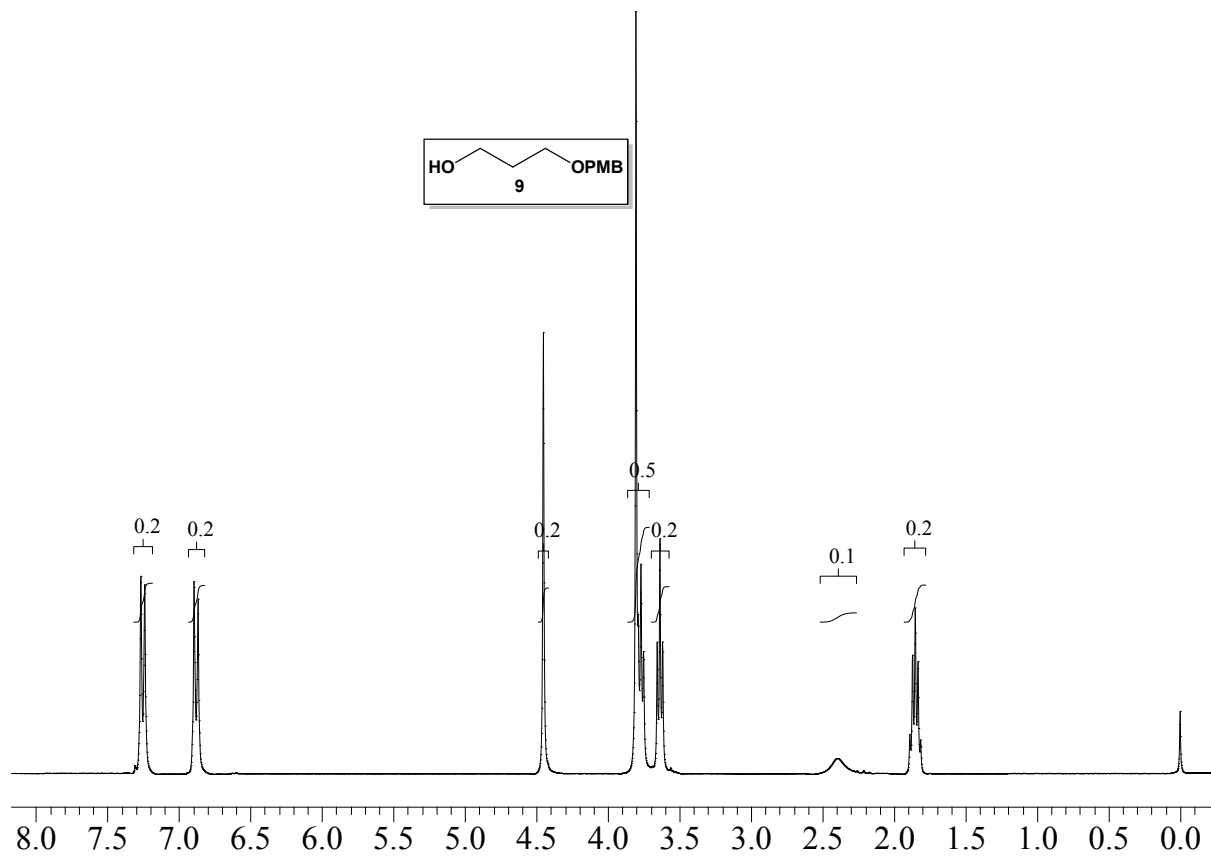

Fig. 1 <sup>1</sup>H NMR spectrum of the compound 9

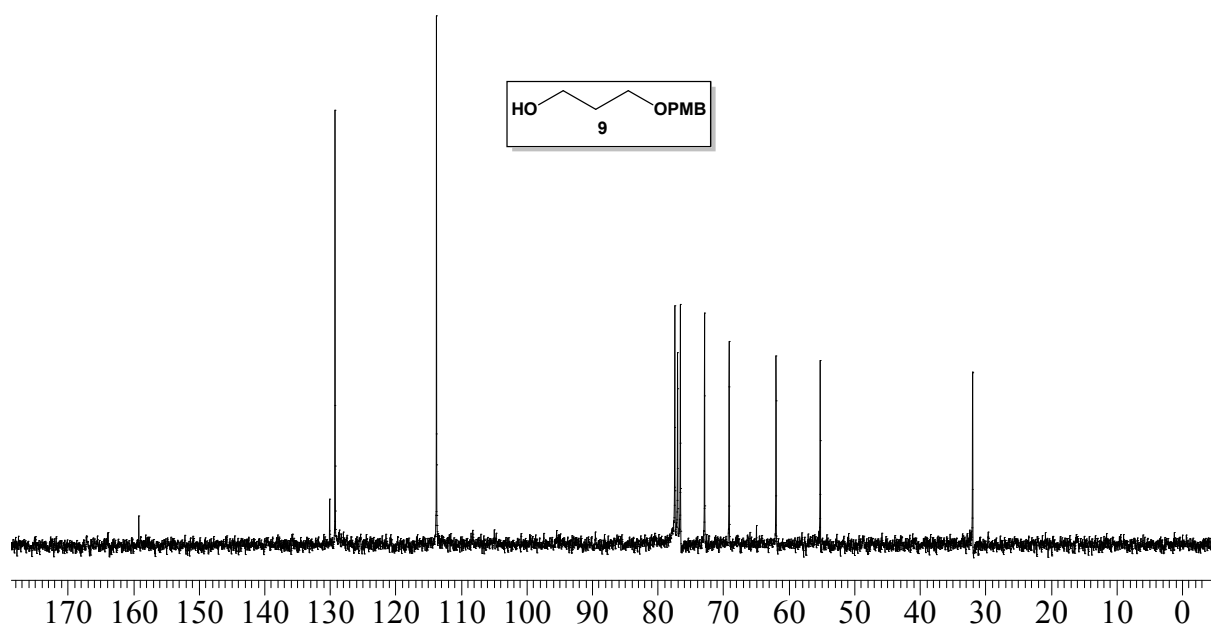

Fig. 2 <sup>13</sup>C NMR spectrum of the compound 9

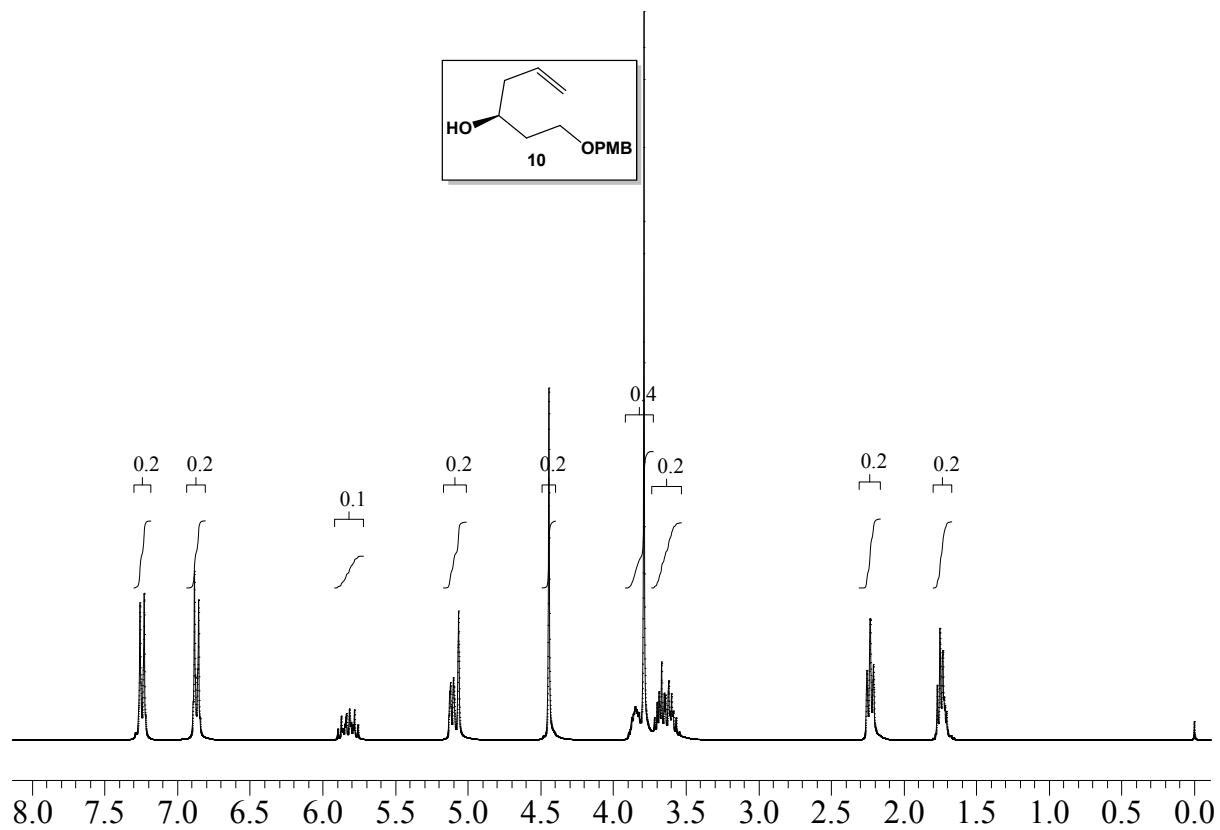

Fig. 3 <sup>1</sup>H NMR spectrum of the compound 10

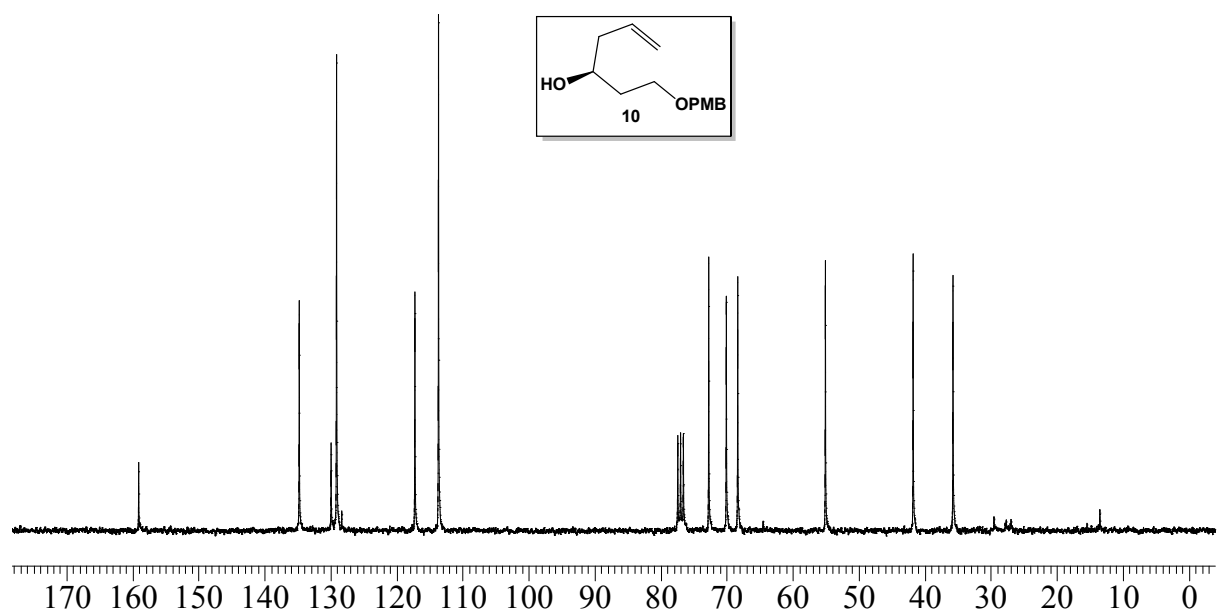

Fig. 4 <sup>13</sup>C NMR spectrum of the compound 10

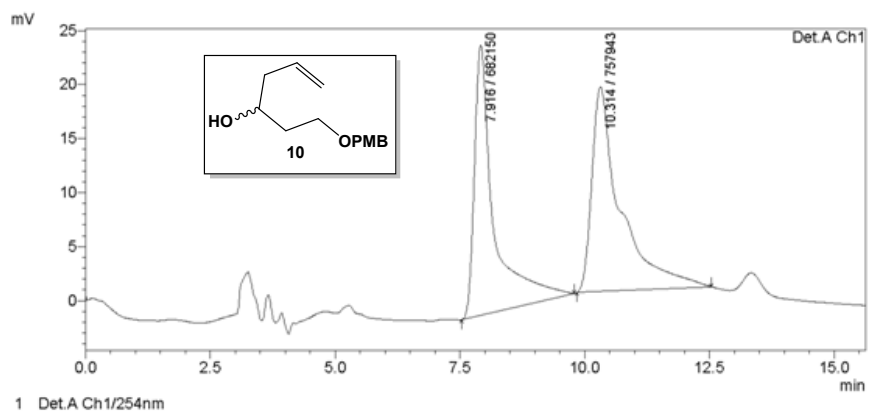

PeakTable

| Peak# | Ret. Time | Area    | Height | Area %  | Height % |
|-------|-----------|---------|--------|---------|----------|
| 1     | 7.916     | 682150  | 24997  | 47.368  | 56.922   |
| 2     | 10.314    | 757943  | 18917  | 52.632  | 43.078   |
| Total |           | 1440093 | 43914  | 100.000 | 100.000  |

Fig. 5 HPLC chromatogram for the racemic compound 10

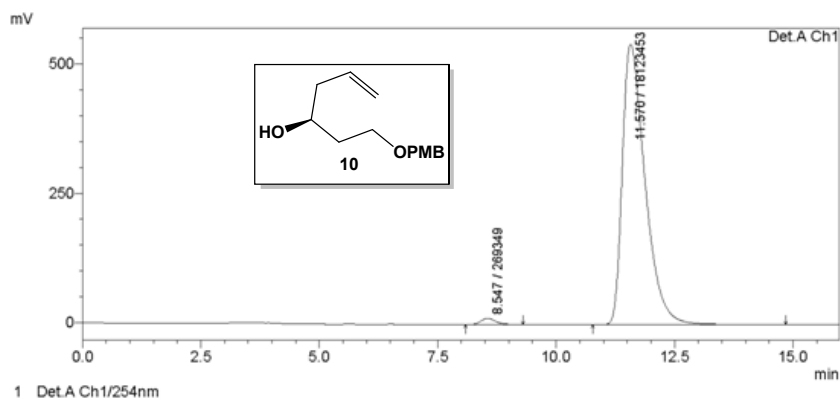

PeakTable

| Peak# | Ret. Time | Area     | Height | Area %  | Height % |
|-------|-----------|----------|--------|---------|----------|
| 1     | 8.547     | 269349   | 12107  | 1.464   | 2.183    |
| 2     | 11.570    | 18123453 | 542370 | 98.536  | 97.817   |
| Total |           | 18392802 | 554477 | 100.000 | 100.000  |

Fig. 6 HPLC chromatogram for the enantiopure compound 10

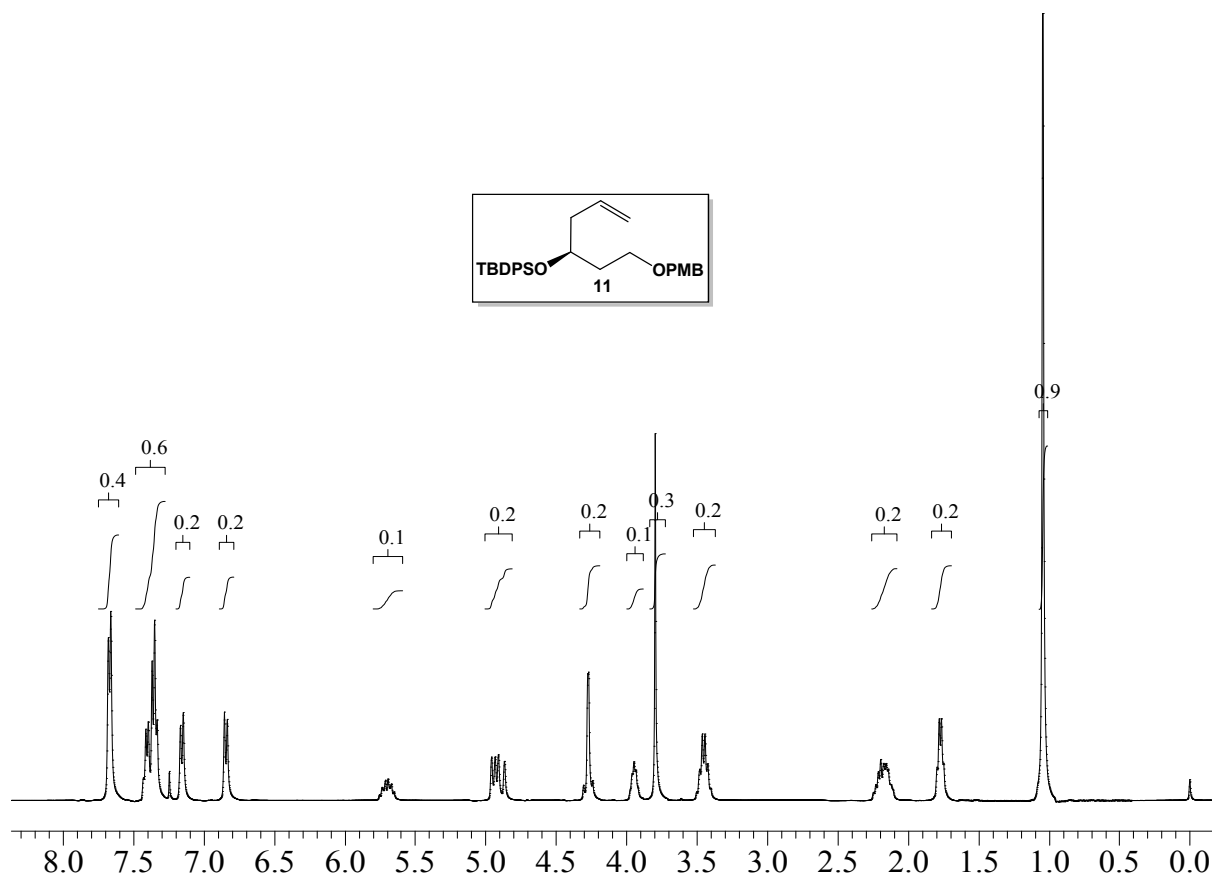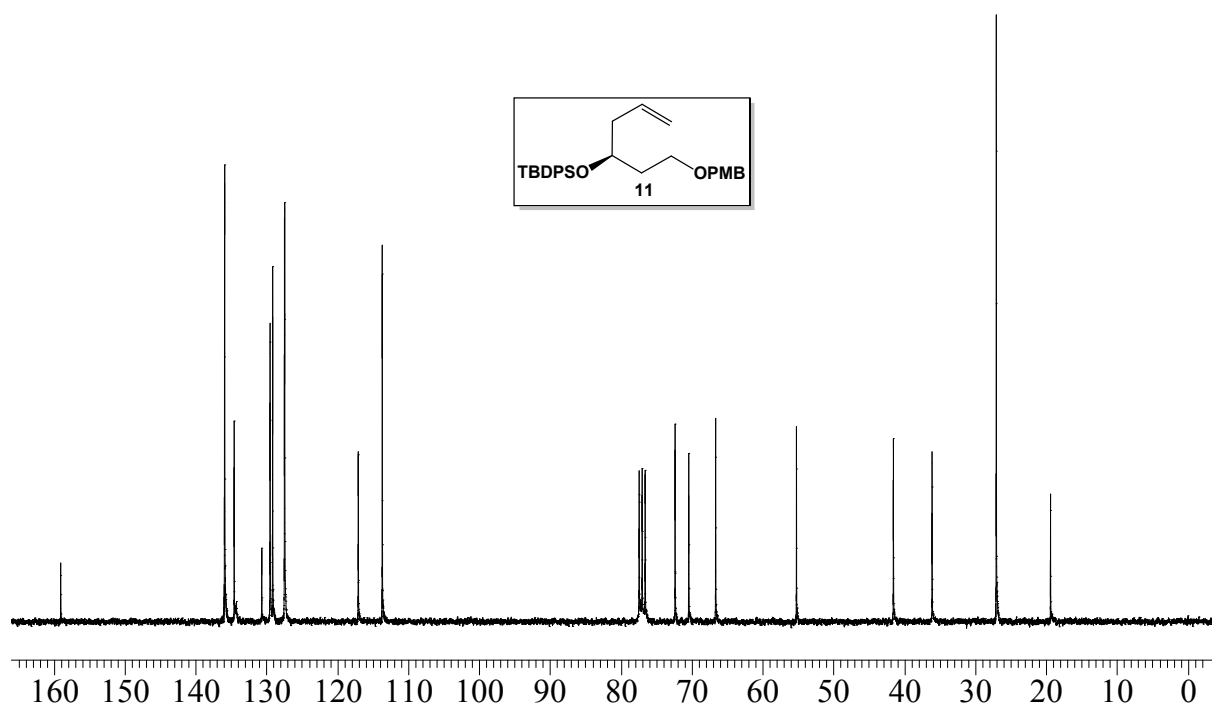

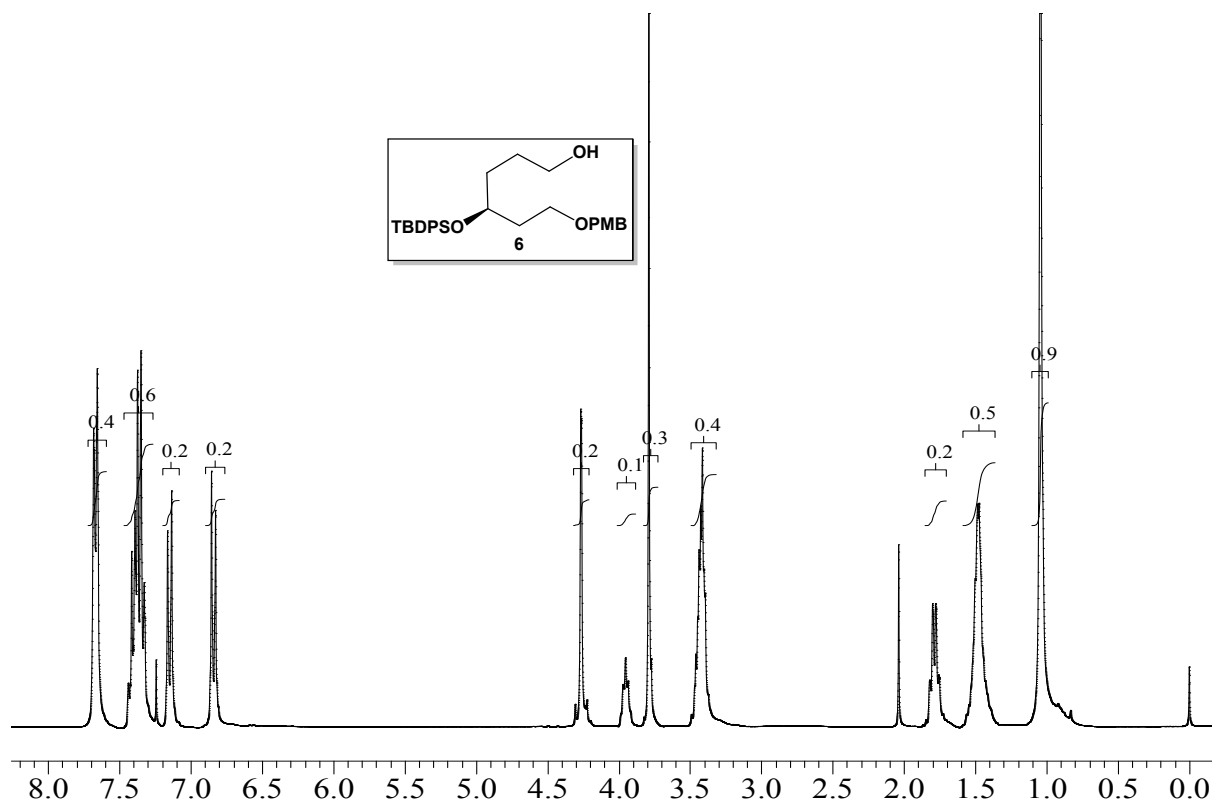

Fig. 9 <sup>1</sup>H NMR spectrum of the compound 6

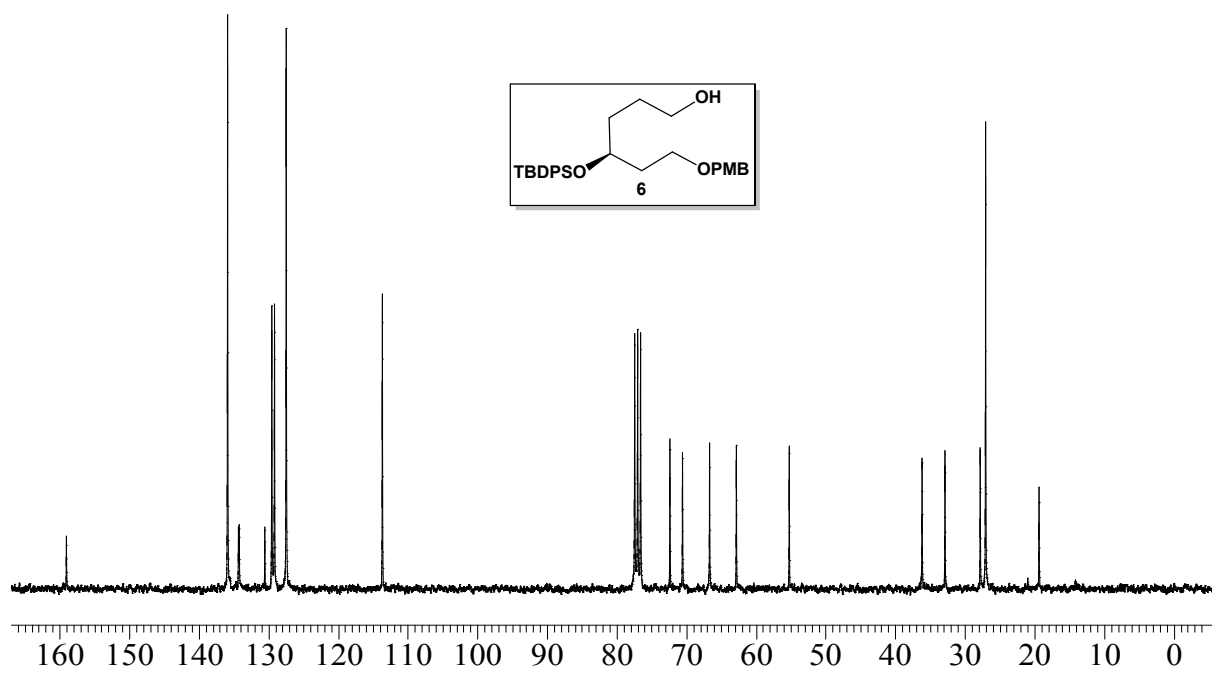

Fig. 10 <sup>13</sup>C NMR spectrum of the compound 6

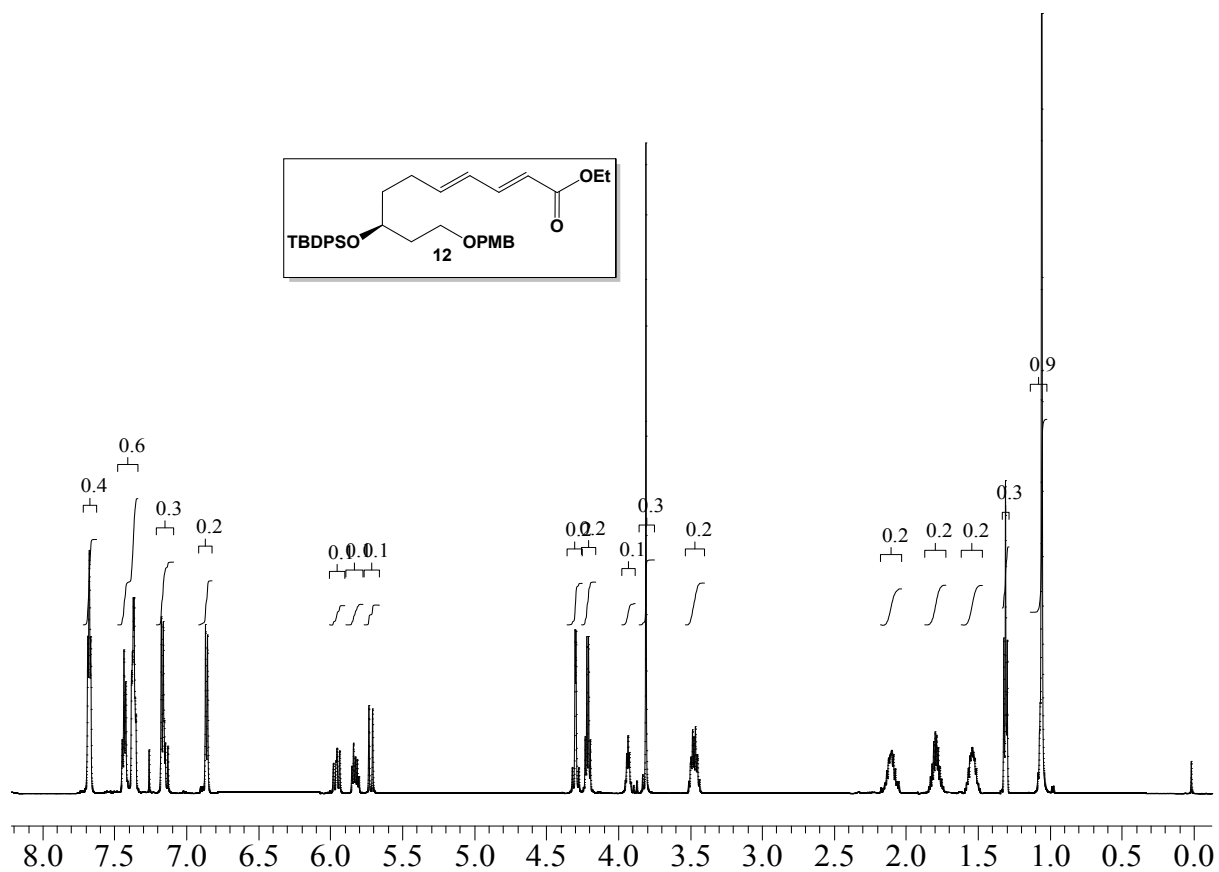

Fig. 11  $^1\text{H}$  NMR spectrum of the compound 12

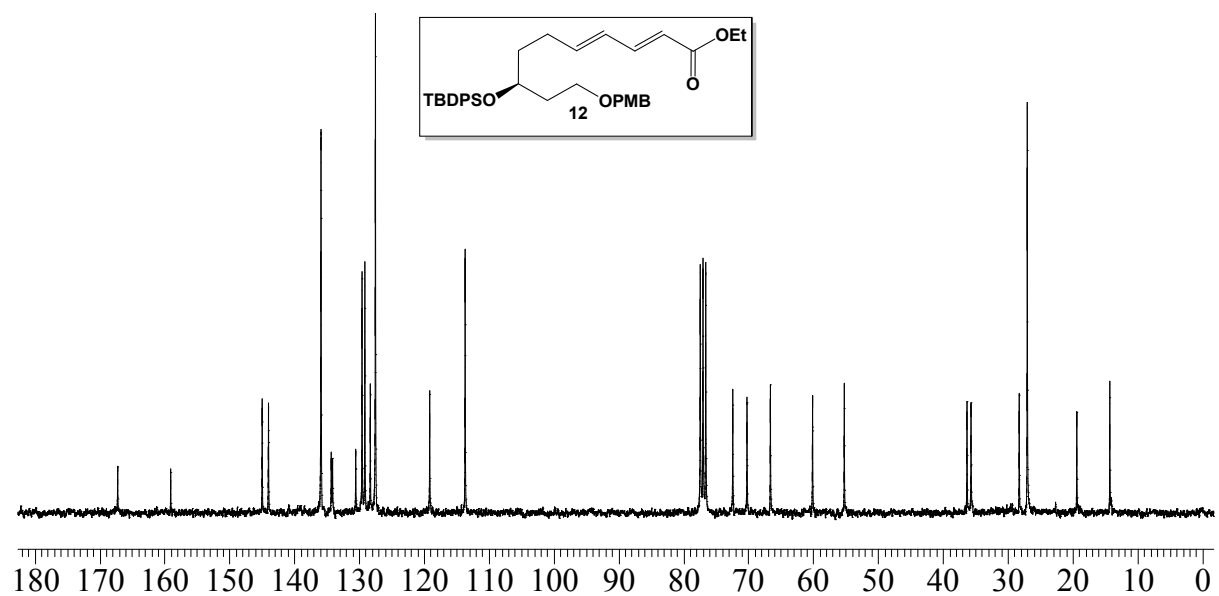

Fig. 12  $^{13}\text{C}$  NMR spectrum of the compound 12



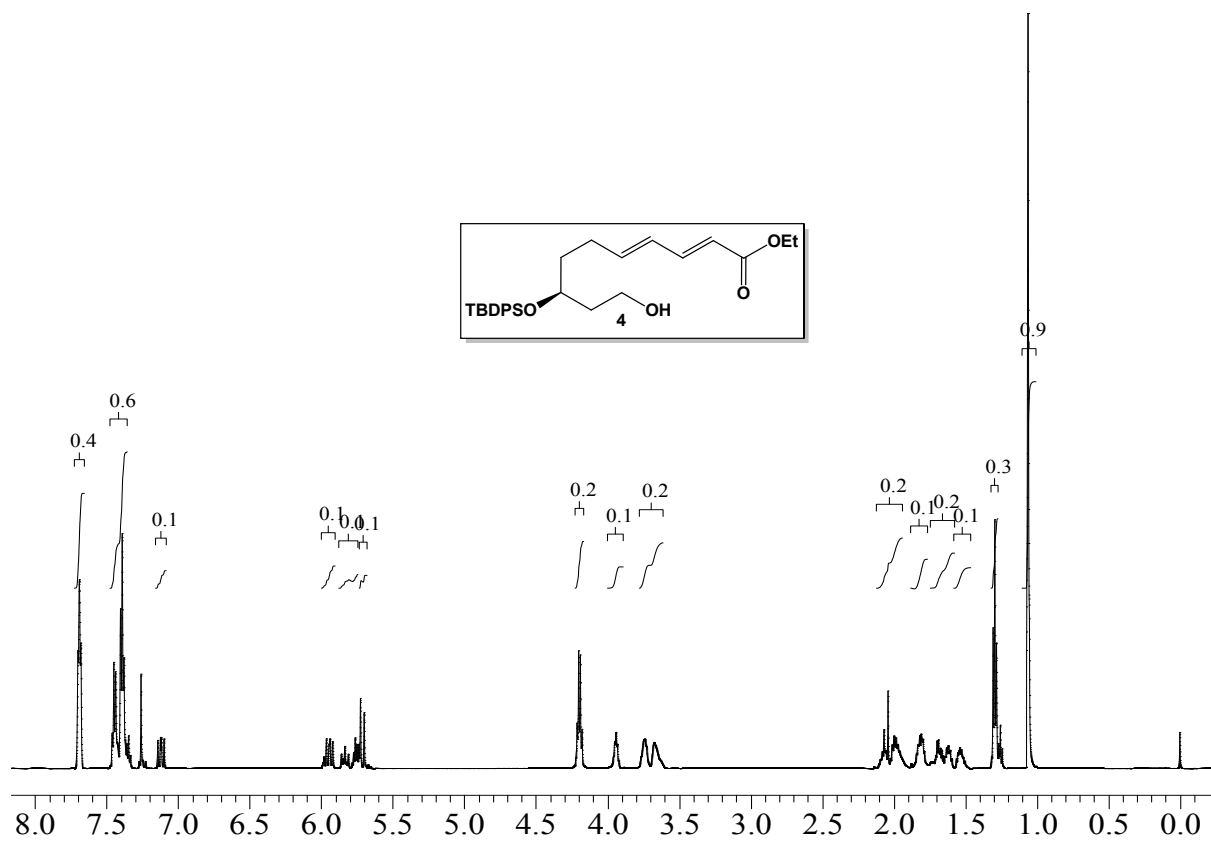

Fig. 13 <sup>1</sup>H NMR spectrum of the compound 4

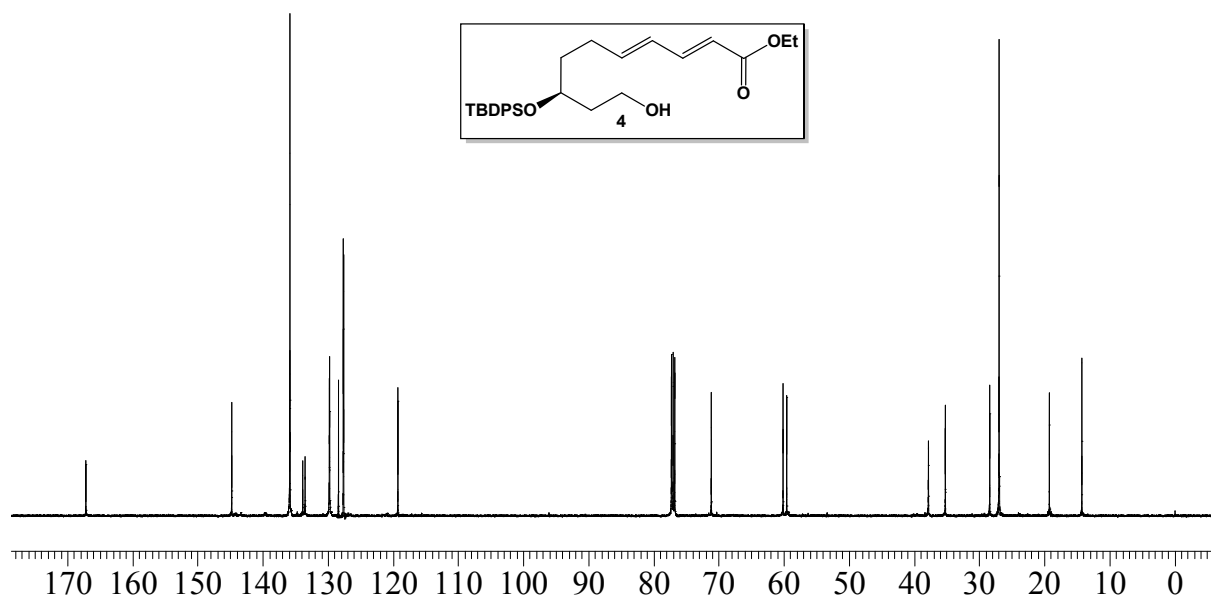

Fig. 14 <sup>13</sup>C NMR spectrum of the compound 4

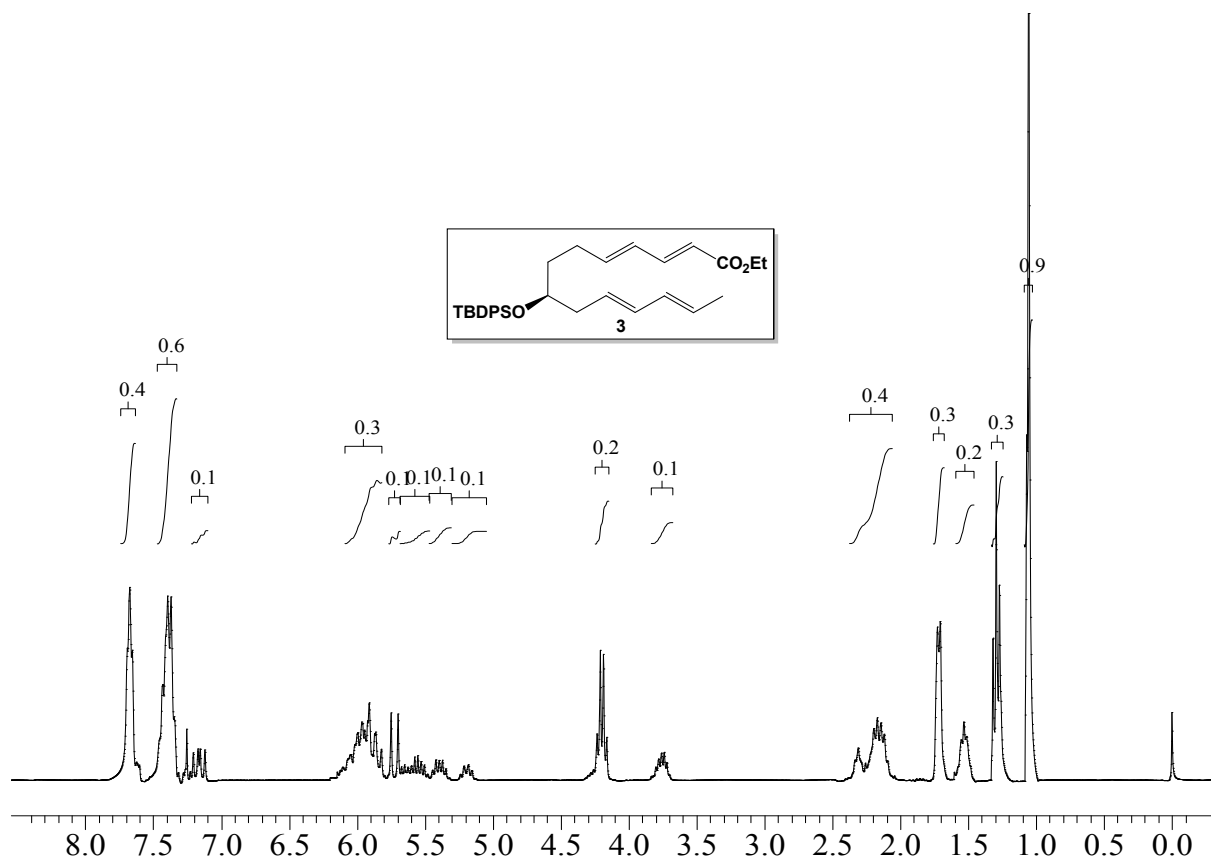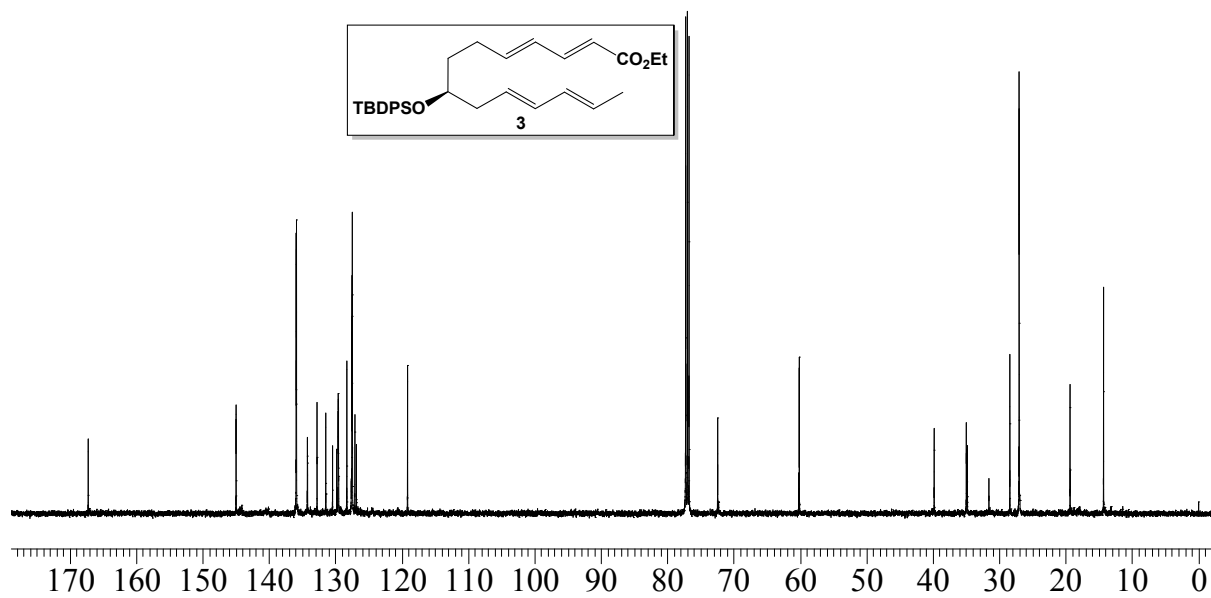

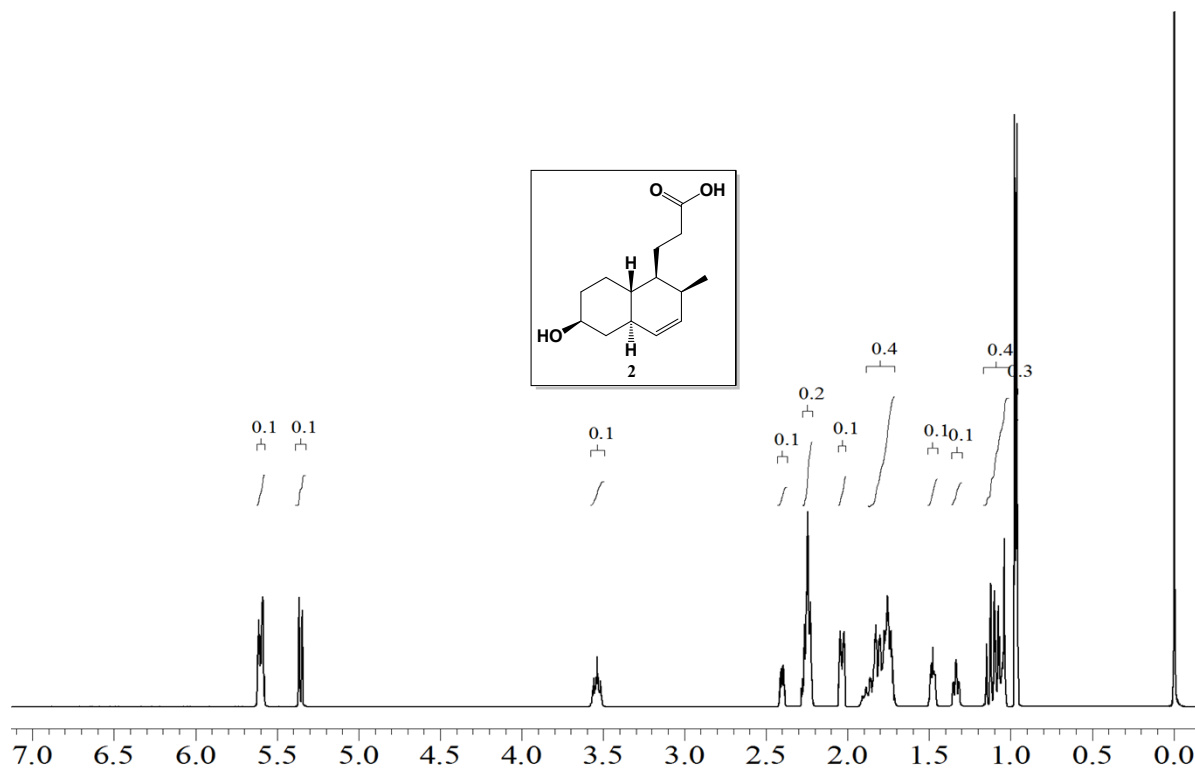

Fig. 17 <sup>1</sup>H NMR spectrum of the compound 2

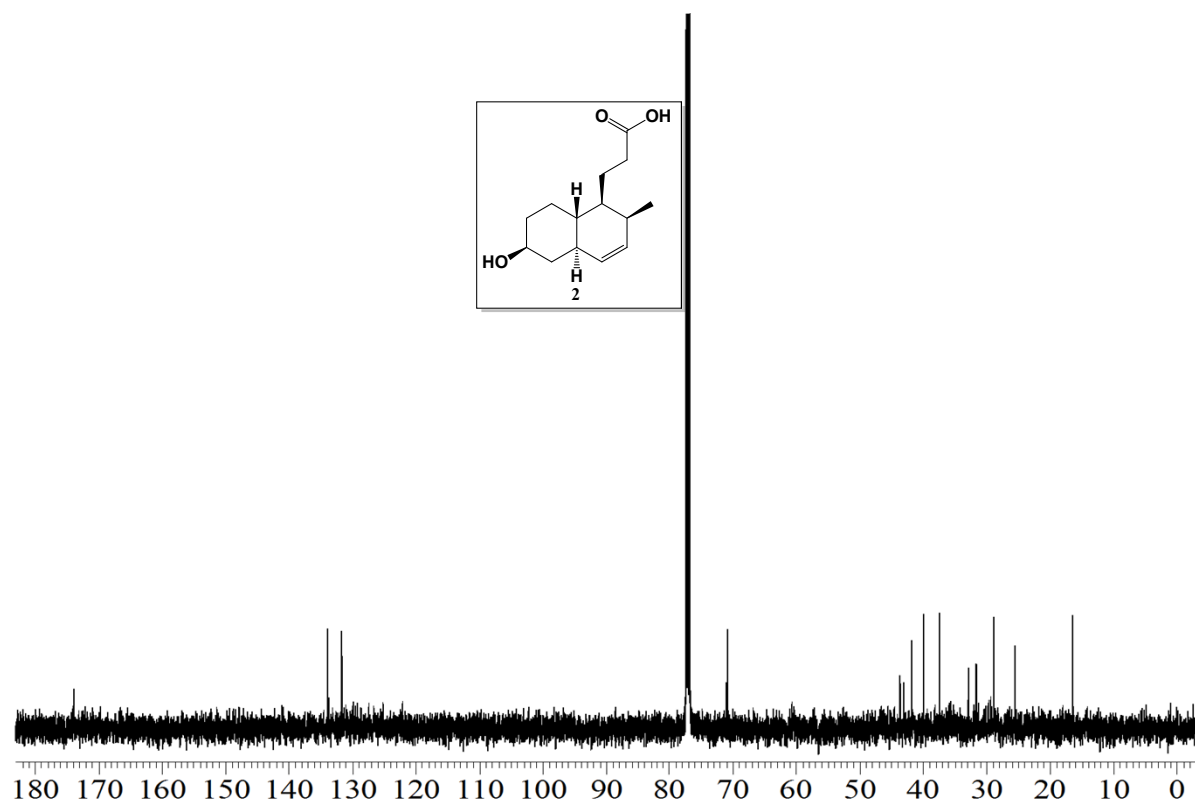

Fig. 18 <sup>13</sup>C NMR spectrum of the compound 2

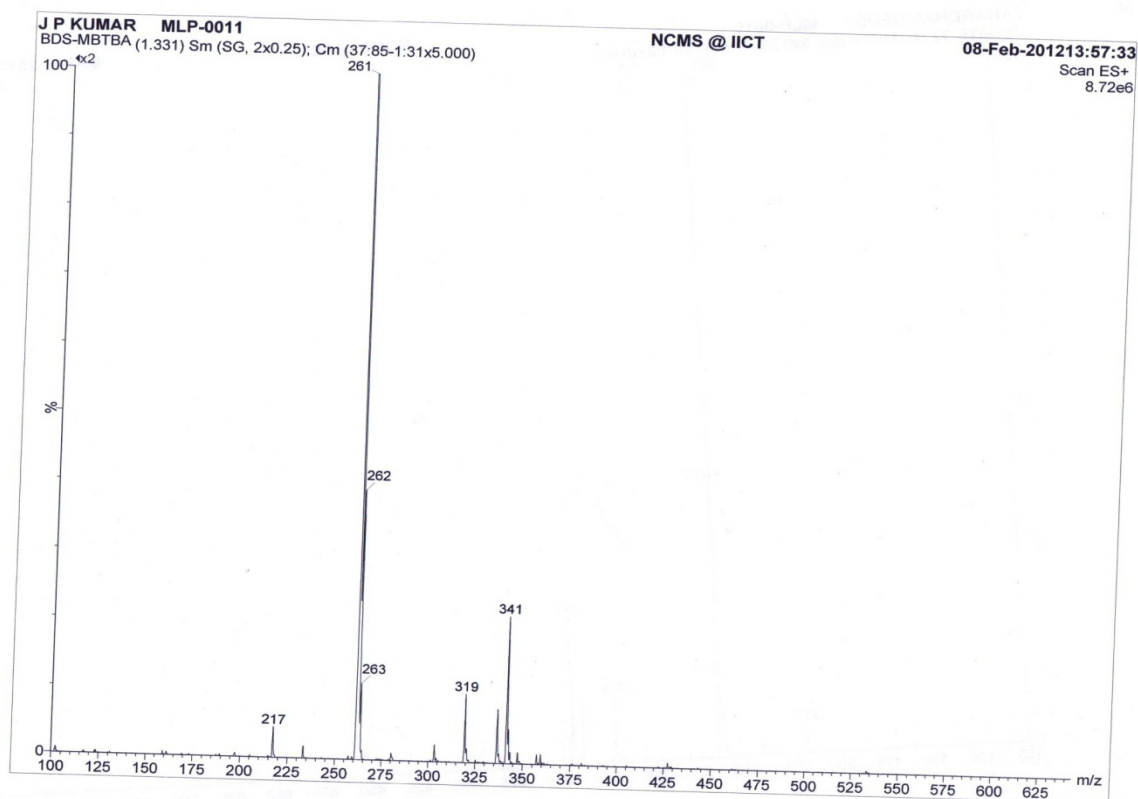

Fig. 19 ESIMS spectrum of the compound 2

Indian Institute of Chemical Technology, Hyderabad  
 FTIR Analysis Report

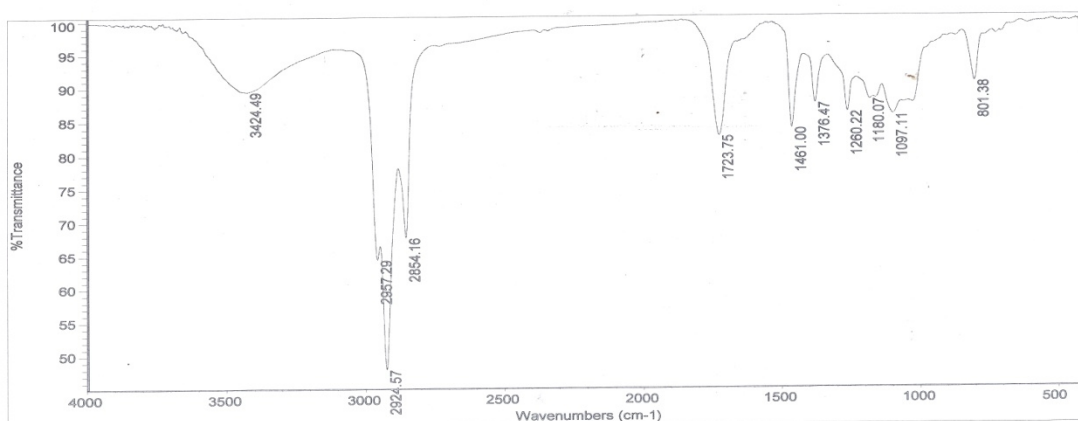

Sample Name: JSY-LAR [NEAT]  
 Sample Preparation:  
 Collection time: Tue Apr 17 15:09:24 2012 (GMT+05:30)  
 Bench: Thermo Nicolet Nexus 670 Spectrometer  
 Resolution: 4cm<sup>-1</sup>

Detector: DTGS KBr  
 Beamsplitter: KBr  
 Source: IR  
 Analyst Name:

Fig. 20 IR spectrum of the compound 2
